# Supplementary material for: Flattened chains dominate the adsorption dynamics of loosely adsorbed chains on modified planar substrates
Source: Royal Society of Chemistry journal article supplement (doi:10.1039/d3sm01339a), 2023-11-27
Supplement: d3sm01339a1.pdf [file d3sm01339a1.pdf]

## **Supplementary Information for:**

### **Flattened chains dominate the adsorption dynamics of loosely adsorbed chains on modified planar substrates**

Jianquan Xu,<sup>#</sup> Lu Bai,<sup>#</sup> Weizhao Ren, Huifeng Zhu, Xianjing Zhou, Cuiyun Zhang,  
Xinping Wang\*

*School of Chemistry and Chemical Engineering, Key Laboratory of Surface &  
Interface Science of Polymer Materials of Zhejiang Province, Zhejiang Sci-Tech  
University, Hangzhou, 310018, P. R. China.*

#### **Corresponding authors**

\*E-mail: [wxinping@zstu.edu.cn](mailto:wxinping@zstu.edu.cn) (X.W.)

#### **Author Contributions**

<sup>#</sup>J.X. and L.B. contributed equally to this work.

# 1. Experimental detail

## 1.1 The calculation of phenyl content by the Cassie equation

The surface fraction of phenyl groups on the substrate was estimated by the Cassie equation<sup>1</sup>, as described in our previous work<sup>2</sup>:

$$\cos \theta = f_{-OH} \cos \theta_{-OH} + f_{-phenyl} \cos \theta_{-phenyl} \quad (f_{-OH} + f_{-phenyl} = 1) \quad \text{Eq. S1}$$

where  $\theta$ ,  $\theta_{-OH}$ , and  $\theta_{-phenyl}$  are water contact angles on the PTS modified substrate, the silicon surface covered with  $-OH$  groups (i.e.,  $7^\circ$ ), and the substrate fully covered with phenyl groups (i.e.,  $91^\circ$ ), respectively, and  $f_{-OH}$  and  $f_{-phenyl}$  are areal fractions for hydroxyl and phenyl groups on the PTS- modified substrate, respectively.

**Table S1.** Details for modify reaction and obtained phenyl contents.

| No.   | $C_{PTS}$<br>(vol%) | Reacting<br>time (min) | Reacting<br>temperature<br>(K) | Water<br>Contact<br>angle ( $^\circ$ ) | Phenyl<br>Content (%) |
|-------|---------------------|------------------------|--------------------------------|----------------------------------------|-----------------------|
| PTS-1 | 0.25                | 15                     | 333                            | $38 \pm 1$                             | 20                    |
| PTS-2 | 0.25                | 30                     |                                | $60 \pm 1$                             | 49                    |
| PTS-3 | 0.25                | 45                     |                                | $72 \pm 1$                             | 69                    |
| PTS-4 | 0.25                | 60                     |                                | $76 \pm 1$                             | 75                    |

## 1.2 XPS and SFG characterization of PTS-modified substrates.

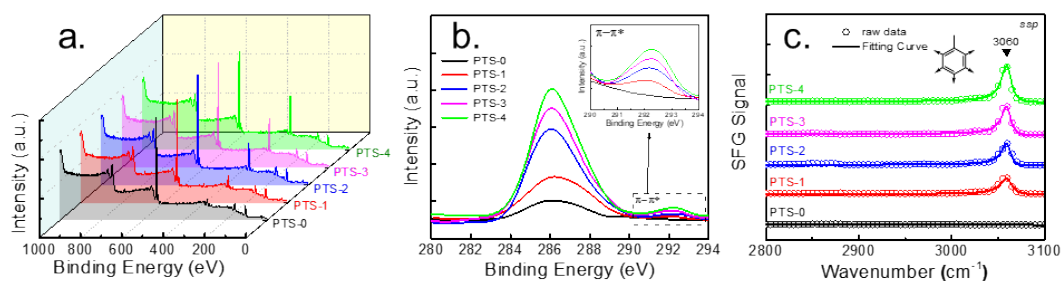

**Fig. S1.** (a) XPS of PTS-modified substrates and (b) High-resolution XPS spectrum in the C1s region for PTS-modified substrates with varying phenyl group contents. The graph in the inset shows the amplified region around  $\pi$ - $\pi^*$  vibrational peak. (c) SFG spectra of PTS-modified substrates surfaces with different phenyl contents.

## 2. To obtain and characterize adsorbed layer on the substrate

### 2.1 Solvent rinsing experiment

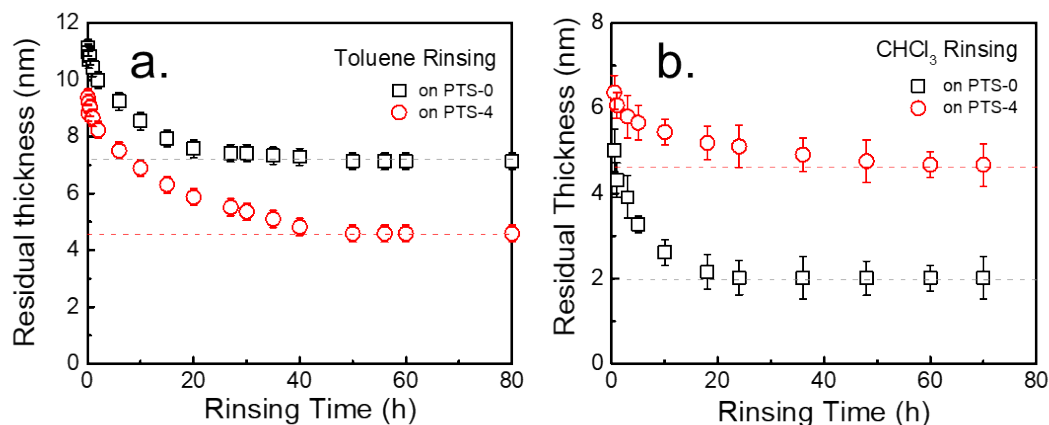

**Fig. S2.** The residual thickness of the PS ( $M_w=225$  kDa) films on the neat SiO<sub>2</sub>-Si substrate (annealing at 423 K for 48 h) and PTS-4 modified substrate (annealing at 423 K for 200 h) rinsed by (a) toluene and (b) CHCl<sub>3</sub> as a function of rinsing time.

### 2.2 XR test for the adsorbed layer on SiO<sub>2</sub>-Si substrate obtained by different solvent elution.

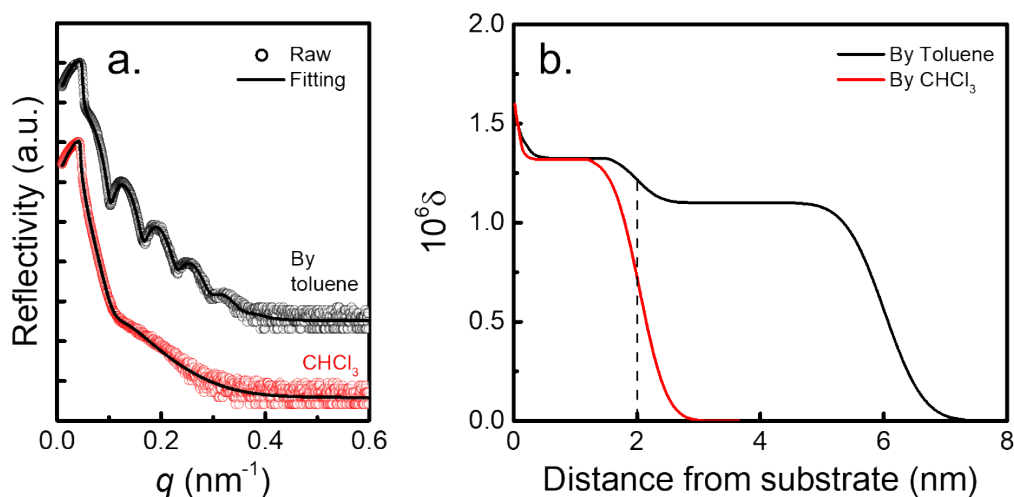

**Fig. S3.** (a) XR curves of the entire adsorbed layer and flattened layer on SiO<sub>2</sub>-Si substrate obtained by annealing the PS ( $M_w=225$  kDa) film at 423 K for 48 h and then leaching to equilibrium using toluene and CHCl<sub>3</sub>, respectively. (b) The dispersion ( $\delta$ ) profiles correspond to the best-fits to the data against the distance ( $z$ ) from the SiO<sub>2</sub> surface.

**Table S2.** The fitting parameters of XR profiles for Fig. S3.

| Leaching solvent             | Fitting model | Low-density PS layer |                |                      | High-density PS layer |                |                      | SiO <sub>2</sub> |                |                      | Si Substrate   | $\chi^2$ |
|------------------------------|---------------|----------------------|----------------|----------------------|-----------------------|----------------|----------------------|------------------|----------------|----------------------|----------------|----------|
|                              |               | Thickness (nm)       | Roughness (nm) | $\delta \times 10^6$ | Thickness (nm)        | Roughness (nm) | $\delta \times 10^6$ | Thickness (nm)   | Roughness (nm) | $\delta \times 10^6$ | Roughness (nm) |          |
| Toluene<br>CHCl <sub>3</sub> | 4-layer       | 6.3                  | 0.43           | 1.14                 | 1.9                   | 0.36           | 1.31                 | 1.9              | 0.34           | 7.12                 | 0.25           | 0.007    |
|                              |               | /                    | /              | /                    | 2.1                   | 0.78           | 1.29                 | 2.0              | 0.42           | 7.12                 | 0.33           | 0.005    |

### 2.3. Fitting parameters of the XR data in Fig. 2

**Table S3.** The fitting results of a three-layer model of XR profiles for Fig. 2.

| No.   | Fitting model | PS adsorbed layer |                |                      | SiO <sub>2</sub> |                |                      | Si Substrate   | $\chi^2$ |
|-------|---------------|-------------------|----------------|----------------------|------------------|----------------|----------------------|----------------|----------|
|       |               | Thickness (nm)    | Roughness (nm) | $\delta \times 10^6$ | Thickness (nm)   | Roughness (nm) | $\delta \times 10^6$ | Roughness (nm) |          |
| PTS-0 | 3-layer       | 8.5               | 0.25           | 1.21                 | 1.9              | 0.24           | 7.12                 | 0.46           | 0.037    |
| PTS-2 |               | 5.2               | 0.76           | 1.61                 | 2.0              | 0.31           | 7.12                 | 0.52           | 0.042    |
| PTS-4 |               | 4.6               | 0.98           | 1.69                 | 2.1              | 0.43           | 7.12                 | 0.43           | 0.007    |

**Table S4.** The fitting results of a four-layer model of XR profiles for Fig. 2.

| No.   | Fitting model | Low-density PS layer |                |                      | High-density PS layer |                |                      | SiO <sub>2</sub> |                |                      | Si Substrate   | $\chi^2$ |
|-------|---------------|----------------------|----------------|----------------------|-----------------------|----------------|----------------------|------------------|----------------|----------------------|----------------|----------|
|       |               | Thickness (nm)       | Roughness (nm) | $\delta \times 10^6$ | Thickness (nm)        | Roughness (nm) | $\delta \times 10^6$ | Thickness (nm)   | Roughness (nm) | $\delta \times 10^6$ | Roughness (nm) |          |
| PTS-0 | 4-layer       | 6.3                  | 0.36           | 1.14                 | 2.0                   | 0.28           | 1.31                 | 2.1              | 0.32           | 7.12                 | 0.48           | 0.007    |
| PTS-2 |               | 2.4                  | 0.48           | 1.14                 | 2.7                   | 0.45           | 1.53                 | 2.0              | 0.28           | 7.12                 | 0.47           | 0.008    |
| PTS-4 |               | 2.4                  | 0.66           | 1.66                 | 2.3                   | 0.87           | 1.68                 | 2.0              | 0.45           | 7.12                 | 0.36           | 0.037    |

For the fitting of XR data, we carefully checked the fitting parameters and contrastively analyzed the goodness-of-fit for models with three- or four-layer model. That is, a four-layer model of Si/SiO<sub>2</sub>/high-density PS/low-density PS and a three-layer model of Si/SiO<sub>2</sub>/PS adsorbed layer were both employed by using *REFLEX* software. In the fitting, the thickness, X-ray refractive index ( $\delta$ ) (which is proportional to mass density) and roughness of the PS layers, as well as the thickness and roughness of SiO<sub>2</sub> layer, were allowed to refine. While the  $\delta$  of SiO<sub>2</sub> layer was fixed as a reported data of  $7.13 \times 10^{-6}$ .<sup>3</sup> A refinement procedure was used to minimize the differences between the model and experimental data (i.e. minimize  $\chi^2$ ). The results were displayed in Table S3 and Table S4. By comparing the fitting results of three-layer and four-layer model, it is clearly shown that for the PS interfacial sublayer on PTS-0 (SiO<sub>2</sub>-Si) and PTS-2 substrates, four-layer model is preferable than three-layer

model with much smaller  $\chi^2$  (about an order of magnitude smaller), while for PTS-4 substrate, three-layer model was better. However, the fitting results of four-layer model show that the  $\delta$  of both high-density PS layer and low-density PS layer on PTS-4 substrate were very close, which means four-layer model is equals to three-layer model at this situation. Consequently, a four-layer model was chosen for PTS-0 and PTS-2 substrates, while a three-layer model was chosen for PTS-4 substrate (marked by light yellow).

#### 2.4 Adsorption kinetics of PS on various PTS-modified substrates.

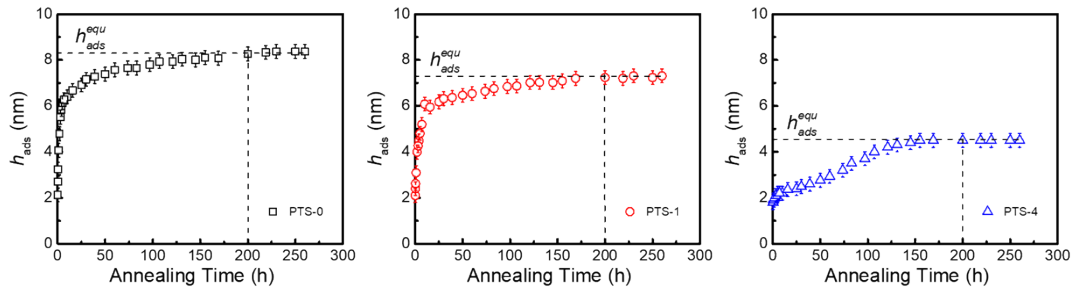

**Fig. S4.** Variation in  $h_{\text{ads}}$  of PS ( $M_w = 225$  kDa) with annealing time in a linear scale at 423 K on PTS-0, PTS-1, and PTS-4.

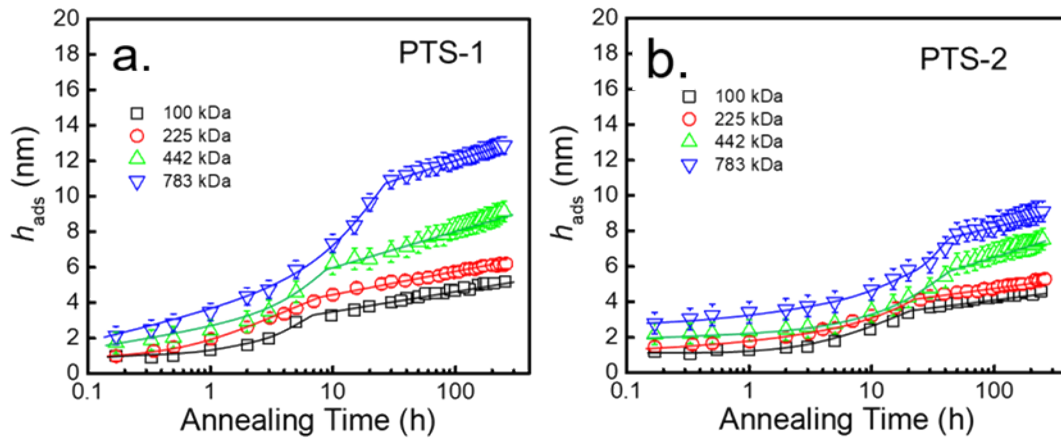

**Fig. S5.** The thickness of the whole adsorbed layer on PTS-1 and PTS-2 substrates against annealing time in a logarithmic scale at 423 K for PS with various molecular weights.

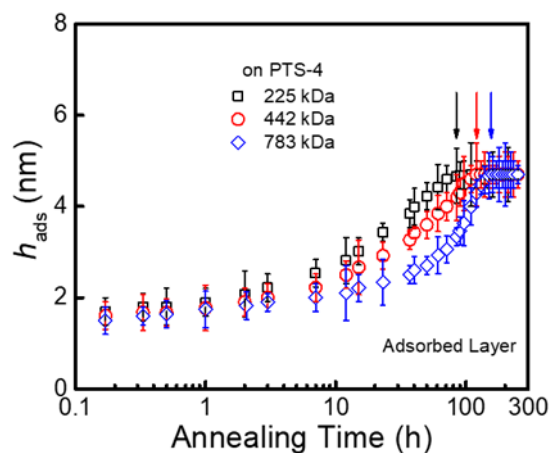

**Fig. S6.** The thickness of the whole adsorbed layer on PTS-4 (75 % phenyl content) substrates against annealing time in a logarithmic scale at 423 K for PS with various molecular weights. It was confirmed that at sufficiently annealing time for PTS-4,  $h_{\text{ads}}=h_{\text{flat}}$ .

### 3. The surface coverage of the flattened chains by AFM

In order to estimate the surface coverage of the PS (Mw=225 kDa) flattened chains, we applied bearing area analysis using NanoScope Analysis software (version 1.40, Bruker).<sup>4</sup> A bearing area gives a percentage of the surface above a critical threshold. For this analysis, AFM height images were used and we set the critical threshold (i.e., the polymer/PTS-modified substrate interface) to 0 nm.

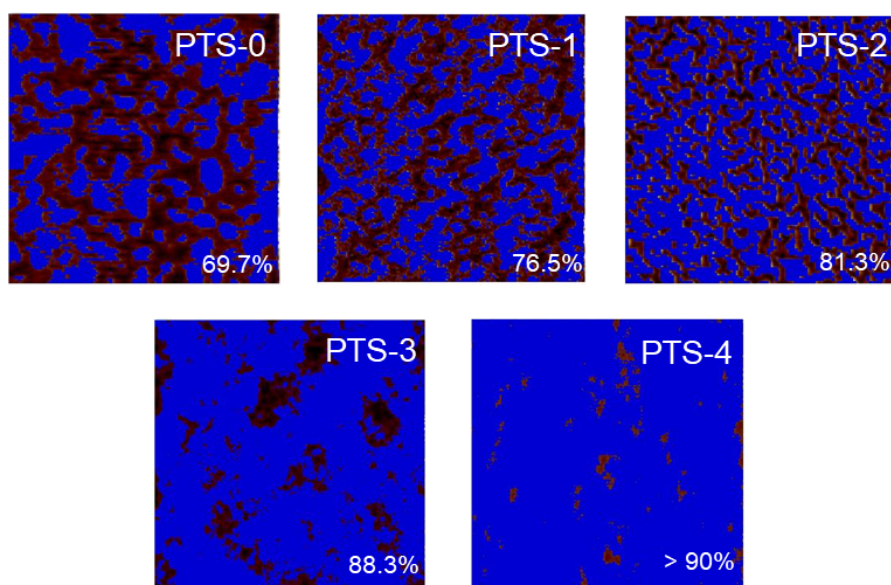

**Fig. S7.** The representative bearing analysis results of the AFM image for Fig. 5.

## References

1. Y. Zhang, H. Fan, Y. Wang, B. Zuo, W. Zhang, S. Wang and X. Wang, *Soft Matter*, 2015, **11**, 9168-9178.
2. F. Zheng, B. Zuo, Y. Zhu, J. Yang and X. Wang, *Soft Matter*, 2013, **9**, 11680-11689.
3. G. Vignauda and A. Gibaudb, *J. Appl. Cryst.*, 2019, **52**, 201–213.
4. N. Jiang, J. Shang, X. Di, M. K. Endoh and T. Koga, *Macromolecules*, 2014, **47**, 2682-2689.
